# Supplementary material for: Phenolic Compounds from Five Ericaceae Species Leaves and Their Related Bioavailability and Health Benefits
Source: MDPI journal article supplement (doi:10.3390/molecules24112046), 2019-05-29
Supplement: s1 [file s1]

# Phenolic compounds from five Ericaceae species leaves and their related bioavailability and several health benefits

Bianca Eugenia Ștefănescu<sup>1,2</sup>, Katalin Szabo<sup>2,\*</sup>, Andrei Mocan<sup>3,1</sup> and Gianina Crișan<sup>1,\*</sup>

<sup>1</sup>Department of Pharmaceutical Botany, "Iuliu Hațieganu" University of Medicine and Pharmacy, 23, Ghe. Marinescu Street, 400337 Cluj-Napoca, Romania

<sup>2</sup>Institute of Life Sciences, University of Agricultural Sciences and Veterinary Medicine, Cluj-Napoca, Calea Mănăștur 3-5, 400372 Cluj-Napoca, Romania

<sup>3</sup>Laboratory of Chromatography, Institute of Advanced Horticulture Research of Transylvania, University of Agricultural Sciences and Veterinary Medicine, 400372 Cluj-Napoca, Romania

The phenolic compounds present in bilberry, lingonberry, bog bilberry, blueberry and bearberry leaves

|                                     | Compound name              | BIL* | LIL* | BBL* | BLL* | BEL* |
|-------------------------------------|----------------------------|------|------|------|------|------|
| Antocyanins(only in the red leaves) | cyanidin-3-O-glucoside     | d    | nd   | d    | d    | nd   |
|                                     | cyanidin-3-O-glucuronide   | nd   | nd   | d    | d    | nd   |
|                                     | cyanidin-3-O-arabinoside   | d    | nd   | d    | d    | nd   |
|                                     | cyanidin-3-O-galactoside   | d    | nd   | nd   | d    | nd   |
| Arbutin derivatives                 | Arbutin                    | nd   | d    | nd   | nd   | d    |
|                                     | 2-O-caffeoylarbutin        | nd   | d    | nd   | nd   | nd   |
|                                     | caffeoyl acetyl arbutin    | nd   | d    | nd   | nd   | nd   |
|                                     | p-coumaroylarbutin         | nd   | d    | nd   | nd   | nd   |
|                                     | p-coumaroyl acetyl arbutin | nd   | d    | nd   | nd   | nd   |
| Catechins                           | Catechin                   | d    | d    | nd   | nd   | d    |
|                                     | epicatechin                | d    | d    | nd   | nd   | d    |
|                                     | gallocatechin              | d    | nd   | nd   | nd   | nd   |
|                                     | epigallocatechin           | d    | nd   | nd   | nd   | d    |
| Cinchonains                         | cinchonain I               | d    | d    | d    | d    | nd   |
|                                     | cinchonain II              | d    | d    | nd   | nd   | nd   |

|                                |                                     |    |    |    |    |    |
|--------------------------------|-------------------------------------|----|----|----|----|----|
| Flavonols                      | Quercetin                           | d  | d  | nd | d  | d  |
|                                | quercetin-3-glucuronide             | d  | nd | nd | nd | nd |
|                                | quercetin-3-O-galactoside           | d  | d  | d  | d  | nd |
|                                | quercetin-3-O-glucoside             | d  | d  | d  | d  | d  |
|                                | quercetin-3-O-rutinoside(rutin)     | nd | d  | nd | d  | nd |
|                                | quercetin-3-O-xyloside              | nd | d  | nd | d  | nd |
|                                | quercetin-3-O-arabinoside           | d  | d  | nd | d  | nd |
|                                | quercetin-3-O-arabinofuranoside     | nd | d  | nd | nd | nd |
|                                | quercetin-3-O-rhamnoside            | d  | d  | d  | nd | nd |
|                                | quercetin-3-O-(4"-HMG)-rhamnoside   | d  | d  | nd | nd | nd |
|                                | quercetin-3-(6"-acetyl) glucoside   | nd | nd | nd | d  | d  |
|                                | kaempferol                          | d  | nd | nd | nd | nd |
|                                | kaempferol-3-glucuronide            | nd | d  | nd | nd | nd |
|                                | kaempferol-(HMG)-rhamnoside         | d  | d  | nd | nd | nd |
|                                | kaempferol-3-O-rhamnoside           | d  | d  | nd | d  | nd |
|                                | kaempferol-3-O-glucoside            | nd | nd | d  | nd | nd |
|                                | kaempferol-3-O-arabinoside          | nd | nd | d  | nd | nd |
|                                | kaempferol-feruloyl-acetylglucoside | nd | nd | d  | nd | nd |
|                                | kaempferolcoumaroylglucoside        | d  | d  | nd | d  | d  |
|                                | isorhamnetin 3-O-arabinoside        |    |    |    |    |    |
|                                | myricetin derivatives               |    |    |    |    |    |
| Iridoids                       | coumaroyliridoid isomers            | d  | d  | d  | nd | nd |
| Phenolic acids and derivatives | caffeic acid                        | d  | d  | nd | d  | d  |
|                                | p-coumaric acid                     | d  | d  | nd | d  | nd |
|                                | caffeoylshikimic acid               | d  | d  | nd | nd | d  |
|                                | 5-caffeoylquinic acid               | d  | d  | d  | d  | nd |
|                                | 4-caffeoylquinic acid               | d  | d  | d  | nd | nd |
|                                | 3-caffeoylquinic acid               | nd | d  | nd | d  | d  |
|                                | dicafeoylquinic acid                | d  | nd | nd | d  | d  |
|                                | caffeoyl hexose hydroxyphenol       | nd | d  | nd | nd | d  |
|                                | 5-p-coumaroylquinic acid            | d  | d  | d  | nd | nd |
|                                | 4-p-coumaroylquinic acid            | d  | d  | d  | nd | nd |
|                                | 3-p-coumaroylquinic acid            | d  | d  | d  | nd | nd |
|                                | coumaroyl hexose hydroxyphenol      | nd | d  | nd | nd | nd |
|                                | p-coumaroyldiacetylhexosides        | d  | nd | nd | nd | nd |
|                                | p-coumaroyltriacylhexosides,        | d  | nd | nd | nd | nd |
|                                | p-coumaroylmalonylhexoside          | d  | nd | nd | nd | nd |

|                   |                                      |    |    |    |    |    |
|-------------------|--------------------------------------|----|----|----|----|----|
|                   | <i>p</i> -coumaroylmalonyldihexoside | d  | nd | nd | nd | nd |
|                   | <i>p</i> -coumaroylmonotropein       | d  | d  | nd | nd | nd |
|                   | feruloylquinic acid                  | d  | d  | d  | nd | nd |
|                   | gallic acid derivative               | d  | nd | d  | nd | d  |
|                   | sinapic acid hexoside                | nd | d  | nd | nd | d  |
| Proanthocyanidins | proanthocyanidin dimer type A        | nd | d  | nd | nd | nd |
|                   | proanthocyanidin trimer type A       | d  | d  | nd | d  | nd |
|                   | proanthocyanidin dimer type B        | d  | d  | d  | nd | nd |
|                   | proanthocyanidin trimer typeB        | d  | d  | nd | d  | nd |
|                   | proanthocyanidin tetramer type B     | d  | d  | nd | nd | nd |

\*BIL-bilberry leaves; LIL-lingonberry leaves; BBL-bog bilberry leaves; BLL-blueberry leaves; BEL-bearberry leaves; d-detected; nd-not detected
